# Supplementary material
Source: publisher figshare collection journal article supplement (https://tandf.figshare.com/articles/dataset/_/1425097)

Appendix Figure 1: Experimental oxygen fugacities (Ballhaus *et al.* 1991).

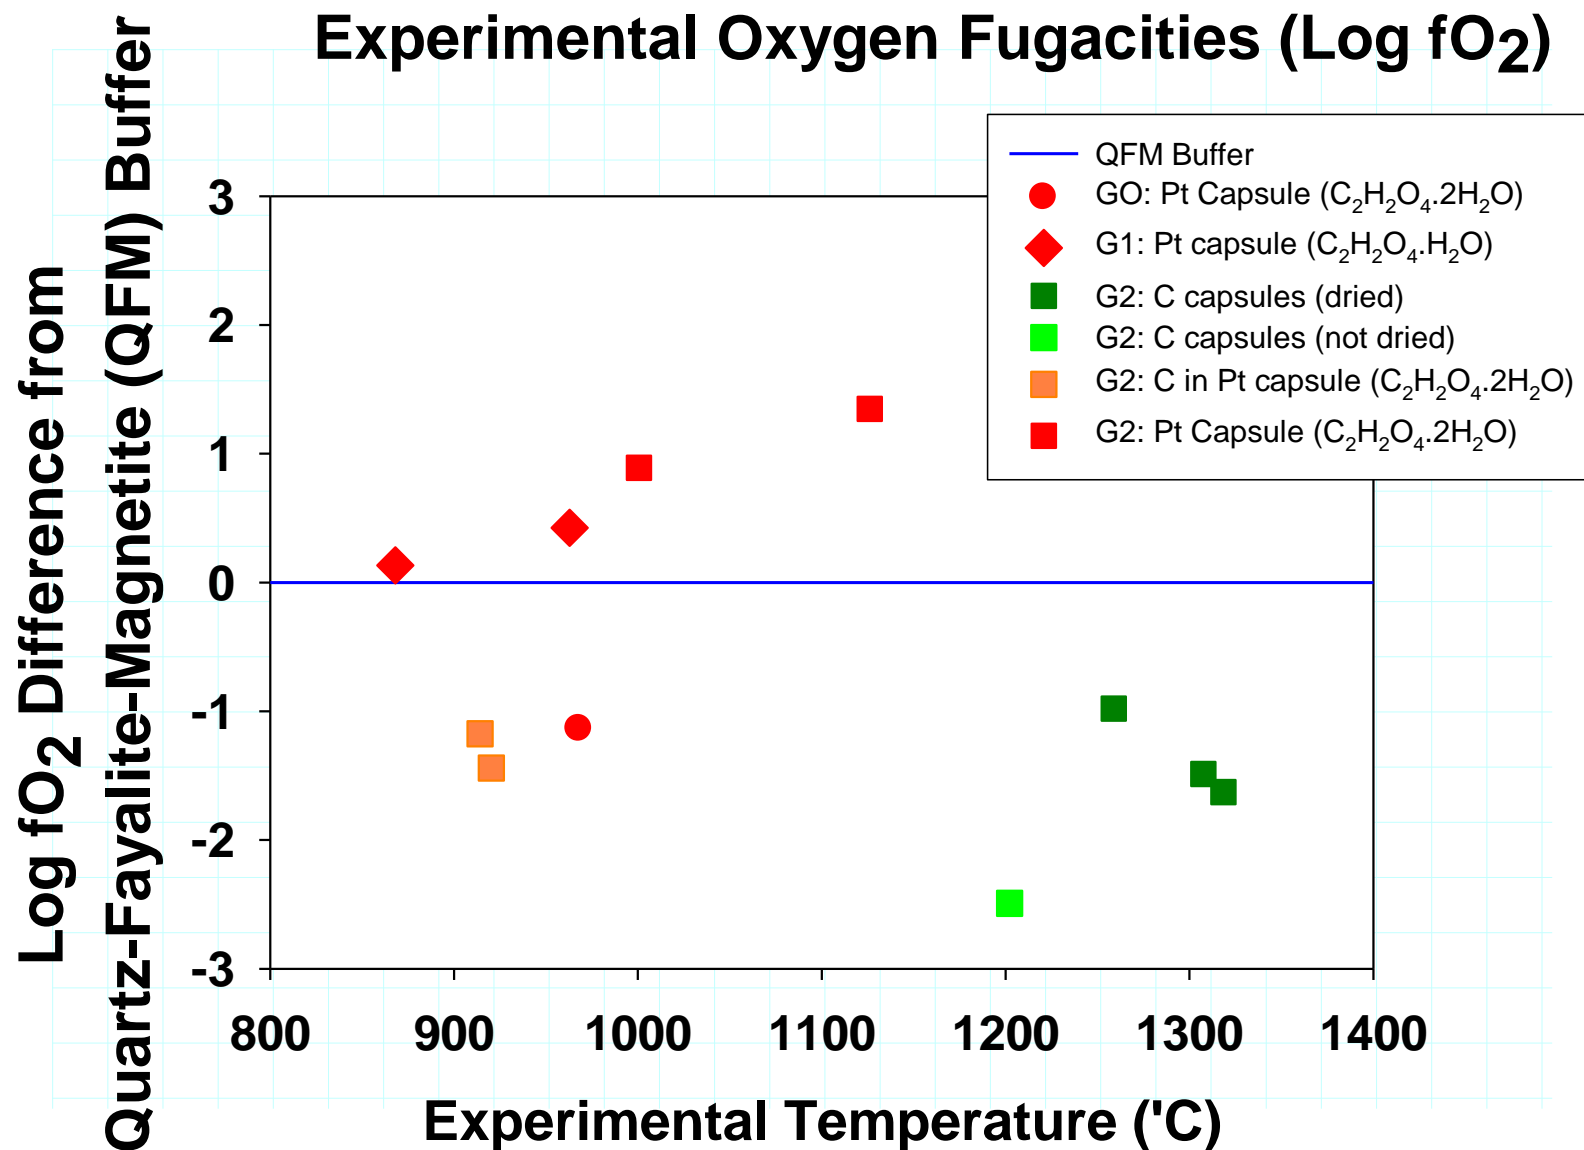

Supplement: Supplementary file 1 [file 2]
